# Supplementary material for: Single Nucleotide Polymorphisms of CBX4 and CBX7 Decrease the Risk of Hepatocellular Carcinoma
Source: PubMed Central journal article supplement (PMC6532305; doi:10.1155/2019/6436825), 2019-05-09
Supplement: 6436825.f1.pdf [file 6436825.f1.pdf]

Table S1: Covariates in logistic regression models of associations between SNPs and HCC

| Factors        | $\beta$ | SE( $\beta$ ) | Wald   | OR(95% CI) <sup>a</sup> | P-value |
|----------------|---------|---------------|--------|-------------------------|---------|
| rs7217395      |         |               |        |                         |         |
| Age            | 0.02    | 0.01          | 3.74   | 1.02(1.00-1.04)         | 0.05    |
| Gender         | -0.62   | 0.30          | 4.19   | 0.54(0.30-0.97)         | 0.04    |
| Smoking habit  | 0.76    | 0.36          | 4.42   | 2.13(1.05-4.31)         | 0.04    |
| Alcohol intake | 0.78    | 0.37          | 4.49   | 2.19(1.06-4.52)         | 0.03    |
| HBsAg          | 3.61    | 0.25          | 204.95 | 37.06(22.60-60.77)      | 0.00    |
| rs2036316      |         |               |        |                         |         |
| Age            | 0.02    | 0.01          | 4.72   | 1.02(1.00-1.04)         | 0.03    |
| Gender         | -0.66   | 0.31          | 4.57   | 0.52(0.28-0.95)         | 0.03    |
| Smoking habit  | 0.91    | 0.36          | 6.37   | 2.48(1.22-5.00)         | 0.01    |
| Alcohol intake | 0.64    | 0.37          | 3.07   | 1.90(0.93-3.90)         | 0.08    |
| HBsAg          | 3.61    | 0.25          | 203.08 | 37.09(22.56-60.96)      | 0.00    |
| rs3764374      |         |               |        |                         |         |
| Age            | 0.02    | 0.01          | 4.35   | 1.02(1.00-1.04)         | 0.04    |
| Gender         | -0.49   | 0.30          | 2.63   | 0.61(0.34-1.11)         | 0.11    |
| Smoking habit  | 0.74    | 0.36          | 4.14   | 2.10(1.03-4.27)         | 0.04    |
| Alcohol intake | 0.66    | 0.37          | 3.16   | 1.94(0.93-4.03)         | 0.08    |
| HBsAg          | 3.58    | 0.26          | 192.82 | 35.95(21.68-59.66)      | 0.00    |
| rs1285251      |         |               |        |                         |         |
| Age            | 0.03    | 0.01          | 6.02   | 1.03(1.01-1.05)         | 0.01    |
| Gender         | -0.60   | 0.30          | 3.84   | 0.55(0.30-1.00)         | 0.05    |
| Smoking habit  | 0.81    | 0.35          | 5.25   | 2.24(1.12-4.46)         | 0.02    |
| Alcohol intake | 0.71    | 0.36          | 3.87   | 2.03(1.00-4.11)         | 0.05    |
| HBsAg          | 3.62    | 0.25          | 204.16 | 37.19(22.65-61.07)      | 0.00    |
| rs2289728      |         |               |        |                         |         |
| Age            | 0.02    | 0.01          | 4.48   | 1.02(1.00-1.04)         | 0.03    |
| Gender         | -0.62   | 0.30          | 4.24   | 0.54(0.30-0.97)         | 0.04    |
| Smoking habit  | 0.86    | 0.35          | 5.92   | 2.37(1.18-4.74)         | 0.02    |
| Alcohol intake | 0.75    | 0.36          | 4.26   | 2.12(1.04-4.32)         | 0.04    |
| HBsAg          | 3.63    | 0.25          | 206.56 | 37.61(22.93-61.68)      | 0.00    |
| rs7292074      |         |               |        |                         |         |
| Age            | 0.03    | 0.01          | 7.29   | 1.03(1.01-1.05)         | 0.01    |
| Gender         | -0.46   | 0.30          | 2.42   | 0.63(0.35-1.13)         | 0.12    |
| Smoking habit  | 0.82    | 0.35          | 5.41   | 2.26(1.14-4.50)         | 0.02    |
| Alcohol intake | 0.73    | 0.36          | 4.06   | 2.07(1.02-4.20)         | 0.04    |
| HBsAg          | 3.58    | 0.25          | 205.88 | 35.99(22.06-58.72)      | 0.00    |
| rs710190       |         |               |        |                         |         |

|                |       |      |        |                    |      |
|----------------|-------|------|--------|--------------------|------|
| Age            | 0.02  | 0.01 | 4.91   | 1.02(1.00-1.04)    | 0.03 |
| Gender         | -0.58 | 0.30 | 3.76   | 0.56(0.31-1.01)    | 0.05 |
| Smoking habit  | 0.87  | 0.35 | 6.03   | 2.39(1.19-4.78)    | 0.01 |
| Alcohol intake | 0.73  | 0.36 | 4.03   | 2.07(1.02-4.22)    | 0.05 |
| HBsAg          | 3.58  | 0.25 | 205.86 | 36.03(22.08-58.80) | 0.00 |
| rs139394       |       |      |        |                    |      |
| Age            | 0.03  | 0.01 | 5.81   | 1.03(1.01-1.05)    | 0.02 |
| Gender         | -0.54 | 0.31 | 3.13   | 0.58(0.32-1.06)    | 0.08 |
| Smoking habit  | 0.73  | 0.36 | 4.04   | 2.07(1.02-4.20)    | 0.04 |
| Alcohol intake | 0.78  | 0.37 | 4.49   | 2.19(1.06-4.51)    | 0.03 |
| HBsAg          | 3.64  | 0.26 | 203.93 | 37.89(23.01-62.40) | 0.00 |
| rs5750753      |       |      |        |                    |      |
| Age            | 0.02  | 0.01 | 5.45   | 1.02(1.00-1.04)    | 0.02 |
| Gender         | -0.53 | 0.29 | 3.30   | 0.59(0.33-1.04)    | 0.07 |
| Smoking habit  | 0.85  | 0.35 | 5.93   | 2.33(1.18-4.60)    | 0.02 |
| Alcohol intake | 0.79  | 0.36 | 4.92   | 2.21(1.10-4.46)    | 0.03 |
| HBsAg          | 3.47  | 0.24 | 203.23 | 32.25(20.01-52.00) | 0.00 |

Table S2: Covariates in logistic regression models of gene-environment interaction analyses

| Factors                  | $\beta$ | SE( $\beta$ ) | Wald   | OR(95% CI) <sup>a</sup> | P-value |
|--------------------------|---------|---------------|--------|-------------------------|---------|
| rs2289728×Smoking habit  |         |               |        |                         |         |
| Age                      | 0.02    | 0.01          | 4.46   | 1.02(1.00-1.04)         | 0.04    |
| Gender                   | -0.62   | 0.30          | 4.20   | 0.54(0.30-0.97)         | 0.04    |
| Smoking habit            | 0.40    | 1.18          | 0.12   | 1.49(0.15-15.10)        | 0.74    |
| Alcohol intake           | 0.74    | 0.36          | 4.12   | 2.09(1.03-4.27)         | 0.04    |
| HBsAg                    | 3.63    | 0.25          | 206.21 | 37.73(22.99-61.93)      | 0.00    |
| rs2289728×Alcohol intake |         |               |        |                         |         |
| Age                      | 0.02    | 0.01          | 4.39   | 1.02(1.00-1.04)         | 0.04    |
| Gender                   | -0.61   | 0.30          | 4.15   | 0.54(0.30-0.98)         | 0.04    |
| Smoking habit            | 0.89    | 0.36          | 6.24   | 2.43(1.21-4.89)         | 0.01    |
| Alcohol intake           | 1.45    | 1.21          | 1.44   | 4.25(0.40-45.13)        | 0.23    |
| HBsAg                    | 3.62    | 0.25          | 206.72 | 37.42(22.84-61.30)      | 0.00    |
| rs2289728×HBsAg          |         |               |        |                         |         |
| Age                      | 0.02    | 0.01          | 4.42   | 1.02(1.00-1.04)         | 0.04    |
| Gender                   | -0.61   | 0.30          | 4.16   | 0.54(0.30-0.98)         | 0.04    |
| Smoking habit            | 0.87    | 0.35          | 6.00   | 2.38(1.19-4.76)         | 0.01    |
| Alcohol intake           | 0.75    | 0.36          | 4.22   | 2.11(1.04-4.30)         | 0.04    |
| HBsAg                    | 3.60    | 0.94          | 14.80  | 36.58(5.84-228.99)      | 0.00    |

|                         |       |      |        |                    |      |
|-------------------------|-------|------|--------|--------------------|------|
| rs139394×Smoking habit  |       |      |        |                    |      |
| Age                     | 0.02  | 0.01 | 5.13   | 1.02(1.00-1.04)    | 0.02 |
| Gender                  | -0.52 | 0.30 | 2.97   | 0.59(0.33-1.08)    | 0.09 |
| Smoking habit           | 1.65  | 0.92 | 3.23   | 5.21(0.86-31.61)   | 0.07 |
| Alcohol intake          | 0.79  | 0.37 | 4.62   | 2.21(1.07-4.55)    | 0.03 |
| HBsAg                   | 3.62  | 0.25 | 205.82 | 37.50(22.85-61.52) | 0.00 |
| rs139394×Alcohol intake |       |      |        |                    |      |
| Age                     | 0.02  | 0.01 | 5.29   | 1.02(1.00-1.04)    | 0.02 |
| Gender                  | -0.51 | 0.30 | 2.85   | 0.60(0.33-1.09)    | 0.09 |
| Smoking habit           | 0.76  | 0.36 | 4.43   | 2.14(1.05-4.33)    | 0.04 |
| Alcohol intake          | 1.87  | 1.01 | 3.45   | 6.47(0.90-46.44)   | 0.06 |
| HBsAg                   | 3.62  | 0.25 | 205.46 | 37.32(22.75-61.22) | 0.00 |
| rs139394×HBsAg          |       |      |        |                    |      |
| Age                     | 0.02  | 0.01 | 5.33   | 1.02(1.00-1.05)    | 0.02 |
| Gender                  | -0.53 | 0.30 | 3.02   | 0.59(0.33-1.07)    | 0.08 |
| Smoking habit           | 0.77  | 0.36 | 4.62   | 2.16(1.07-4.37)    | 0.03 |
| Alcohol intake          | 0.78  | 0.37 | 4.49   | 2.19(1.06-4.51)    | 0.03 |
| HBsAg                   | 3.22  | 0.75 | 18.50  | 25.11(5.78-109.07) | 0.00 |

Table S3: Covariates in logistic regression models of SNP-SNP interaction analyses

| Factors              | $\beta$ | SE( $\beta$ ) | Wald   | OR(95% CI) <sup>a</sup> | P-value |
|----------------------|---------|---------------|--------|-------------------------|---------|
| rs2289728× rs7217395 |         |               |        |                         |         |
| Age                  | 0.02    | 0.01          | 3.49   | 1.02(1.00-1.04)         | 0.06    |
| Gender               | -0.71   | 0.31          | 5.32   | 0.49(0.27-0.90)         | 0.02    |
| Smoking habit        | 0.87    | 0.36          | 5.73   | 2.39(1.17-4.87)         | 0.02    |
| Alcohol intake       | 0.76    | 0.37          | 4.14   | 2.13(1.03-4.41)         | 0.04    |
| HBsAg                | 3.65    | 0.26          | 200.31 | 38.57(23.26-63.97)      | 0.00    |
| rs2289728× rs2036316 |         |               |        |                         |         |
| Age                  | 0.02    | 0.01          | 3.83   | 1.02(1.00-1.04)         | 0.05    |
| Gender               | -0.70   | 0.31          | 5.14   | 0.50(0.27-0.91)         | 0.02    |
| Smoking habit        | 0.95    | 0.36          | 6.94   | 2.60(1.28-5.27)         | 0.01    |
| Alcohol intake       | 0.73    | 0.37          | 3.90   | 2.08(1.01-4.28)         | 0.05    |
| HBsAg                | 3.60    | 0.26          | 196.09 | 36.40(22.01-60.21)      | 0.00    |
| rs2289728× rs3764374 |         |               |        |                         |         |
| Age                  | 0.02    | 0.01          | 3.49   | 1.02(1.00-1.04)         | 0.06    |
| Gender               | -0.60   | 0.31          | 3.89   | 0.55(0.30-1.00)         | 0.05    |
| Smoking habit        | 0.85    | 0.37          | 5.30   | 2.35(1.14-4.85)         | 0.02    |
| Alcohol intake       | 0.71    | 0.38          | 3.51   | 2.04(0.97-4.29)         | 0.06    |
| HBsAg                | 3.56    | 0.26          | 187.62 | 35.08(21.09-58.37)      | 0.00    |

## rs2289728× rs1285251

|                |       |      |        |                    |      |
|----------------|-------|------|--------|--------------------|------|
| Age            | 0.02  | 0.01 | 5.57   | 1.02(1.00-1.05)    | 0.02 |
| Gender         | -0.69 | 0.31 | 5.06   | 0.50(0.28-0.92)    | 0.03 |
| Smoking habit  | 0.89  | 0.36 | 6.20   | 2.44(1.21-4.91)    | 0.01 |
| Alcohol intake | 0.74  | 0.36 | 4.11   | 2.09(1.03-4.28)    | 0.04 |
| HBsAg          | 3.64  | 0.26 | 201.14 | 38.23(23.11-63.26) | 0.00 |

## rs2289728×rs7292074

|                |       |      |        |                    |      |
|----------------|-------|------|--------|--------------------|------|
| Age            | 0.02  | 0.01 | 5.50   | 1.02(1.00-1.05)    | 0.02 |
| Gender         | -0.61 | 0.30 | 4.05   | 0.55(0.30-0.98)    | 0.04 |
| Smoking habit  | 0.88  | 0.35 | 6.13   | 2.40(1.20-4.81)    | 0.01 |
| Alcohol intake | 0.75  | 0.36 | 4.20   | 2.11(1.03-4.30)    | 0.04 |
| HBsAg          | 3.61  | 0.26 | 201.46 | 37.09(22.52-61.08) | 0.00 |

## rs2289728×rs710190

|                |       |      |        |                    |      |
|----------------|-------|------|--------|--------------------|------|
| Age            | 0.02  | 0.01 | 4.69   | 1.02(1.00-1.04)    | 0.03 |
| Gender         | -0.64 | 0.30 | 4.51   | 0.53(0.29-0.95)    | 0.03 |
| Smoking habit  | 0.93  | 0.36 | 6.72   | 2.52(1.25-5.08)    | 0.01 |
| Alcohol intake | 0.74  | 0.37 | 4.13   | 2.10(1.03-4.31)    | 0.04 |
| HBsAg          | 3.60  | 0.26 | 198.90 | 36.55(22.17-60.27) | 0.00 |

## rs2289728×rs139394

|                |       |      |        |                    |      |
|----------------|-------|------|--------|--------------------|------|
| Age            | 0.02  | 0.01 | 4.04   | 1.02(1.00-1.04)    | 0.04 |
| Gender         | -0.63 | 0.31 | 4.21   | 0.53(0.29-0.97)    | 0.04 |
| Smoking habit  | 0.85  | 0.36 | 5.45   | 2.34(1.15-4.77)    | 0.02 |
| Alcohol intake | 0.77  | 0.37 | 4.19   | 2.15(1.03-4.47)    | 0.04 |
| HBsAg          | 3.63  | 0.26 | 198.40 | 37.64(22.72-62.36) | 0.00 |

## rs2289728×rs5750753

|                |       |      |        |                    |      |
|----------------|-------|------|--------|--------------------|------|
| Age            | 0.02  | 0.01 | 4.28   | 1.02(1.00-1.04)    | 0.04 |
| Gender         | -0.64 | 0.30 | 4.50   | 0.53(0.29-0.95)    | 0.03 |
| Smoking habit  | 0.85  | 0.36 | 5.71   | 2.34(1.17-4.71)    | 0.02 |
| Alcohol intake | 0.80  | 0.37 | 4.68   | 2.23(1.08-4.59)    | 0.03 |
| HBsAg          | 3.57  | 0.26 | 196.72 | 35.55(21.58-58.55) | 0.00 |

## rs139394× rs7217395

|                |       |      |        |                    |      |
|----------------|-------|------|--------|--------------------|------|
| Age            | 0.02  | 0.01 | 3.56   | 1.02(1.00-1.04)    | 0.06 |
| Gender         | -0.62 | 0.31 | 3.95   | 0.54(0.30-0.99)    | 0.05 |
| Smoking habit  | 0.73  | 0.37 | 3.93   | 2.08(1.01-4.27)    | 0.05 |
| Alcohol intake | 0.83  | 0.38 | 4.82   | 2.30(1.09-4.83)    | 0.03 |
| HBsAg          | 3.60  | 0.26 | 197.42 | 36.43(22.06-60.15) | 0.00 |

## rs139394× rs2036316

|     |      |      |      |                 |      |
|-----|------|------|------|-----------------|------|
| Age | 0.02 | 0.01 | 4.30 | 1.02(1.00-1.04) | 0.04 |
|-----|------|------|------|-----------------|------|

|                     |       |      |        |                    |      |
|---------------------|-------|------|--------|--------------------|------|
| Gender              | -0.66 | 0.31 | 4.39   | 0.52(0.28-0.96)    | 0.04 |
| Smoking habit       | 0.86  | 0.37 | 5.51   | 2.36(1.15-4.83)    | 0.02 |
| Alcohol intake      | 0.75  | 0.38 | 4.02   | 2.12(1.02-4.43)    | 0.05 |
| HBsAg               | 3.58  | 0.26 | 194.66 | 36.03(21.77-59.60) | 0.00 |
| rs139394× rs3764374 |       |      |        |                    |      |
| Age                 | 0.02  | 0.01 | 4.06   | 1.02(1.00-1.04)    | 0.04 |
| Gender              | -0.48 | 0.31 | 2.45   | 0.62(0.34-1.13)    | 0.12 |
| Smoking habit       | 0.72  | 0.38 | 3.68   | 2.05(0.98-4.29)    | 0.06 |
| Alcohol intake      | 0.75  | 0.39 | 3.78   | 2.11(0.99-4.50)    | 0.05 |
| HBsAg               | 3.56  | 0.26 | 188.74 | 35.18(21.17-58.46) | 0.00 |
| rs139394× rs1285251 |       |      |        |                    |      |
| Age                 | 0.03  | 0.01 | 5.87   | 1.03(1.01-1.05)    | 0.02 |
| Gender              | -0.55 | 0.31 | 3.16   | 0.58(0.32-1.06)    | 0.08 |
| Smoking habit       | 0.78  | 0.36 | 4.70   | 2.19(1.08-4.44)    | 0.03 |
| Alcohol intake      | 0.79  | 0.37 | 4.52   | 2.20(1.06-4.56)    | 0.03 |
| HBsAg               | 3.65  | 0.26 | 199.82 | 38.33(23.12-63.55) | 0.00 |
| rs139394× rs7292074 |       |      |        |                    |      |
| Age                 | 0.03  | 0.01 | 6.26   | 1.03(1.01-1.05)    | 0.01 |
| Gender              | -0.52 | 0.30 | 2.90   | 0.60(0.33-1.08)    | 0.09 |
| Smoking habit       | 0.79  | 0.36 | 4.78   | 2.20(1.09-4.45)    | 0.03 |
| Alcohol intake      | 0.81  | 0.37 | 4.76   | 2.25(1.09-4.64)    | 0.03 |
| HBsAg               | 3.60  | 0.26 | 198.96 | 36.49(22.14-60.16) | 0.00 |
| rs139394× rs710190  |       |      |        |                    |      |
| Age                 | 0.02  | 0.01 | 4.58   | 1.02(1.00-1.04)    | 0.03 |
| Gender              | -0.55 | 0.31 | 3.22   | 0.58(0.32-1.05)    | 0.07 |
| Smoking habit       | 0.78  | 0.37 | 4.58   | 2.18(1.07-4.46)    | 0.03 |
| Alcohol intake      | 0.85  | 0.38 | 5.08   | 2.34(1.12-4.90)    | 0.02 |
| HBsAg               | 3.58  | 0.26 | 197.31 | 35.90(21.78-59.16) | 0.00 |
| rs139394×rs5750753  |       |      |        |                    |      |
| Age                 | 0.02  | 0.01 | 4.93   | 1.02(1.00-1.04)    | 0.03 |
| Gender              | -0.54 | 0.31 | 3.19   | 0.58(0.32-1.06)    | 0.07 |
| Smoking habit       | 0.78  | 0.36 | 4.58   | 2.18(1.07-4.43)    | 0.03 |
| Alcohol intake      | 0.82  | 0.37 | 4.78   | 2.26(1.09-4.70)    | 0.03 |
| HBsAg               | 3.56  | 0.25 | 197.11 | 34.99(21.30-57.47) | 0.00 |
